# Supplementary material for: Analyzing and Characterizing the Chloroplast Genome of Salix wilsonii
Source: PubMed Central journal article supplement (PMC6662467; doi:10.1155/2019/5190425), 2019-07-15
Supplement: 5190425.f6.pdf [file 5190425.f6.pdf]

Growth form    Section

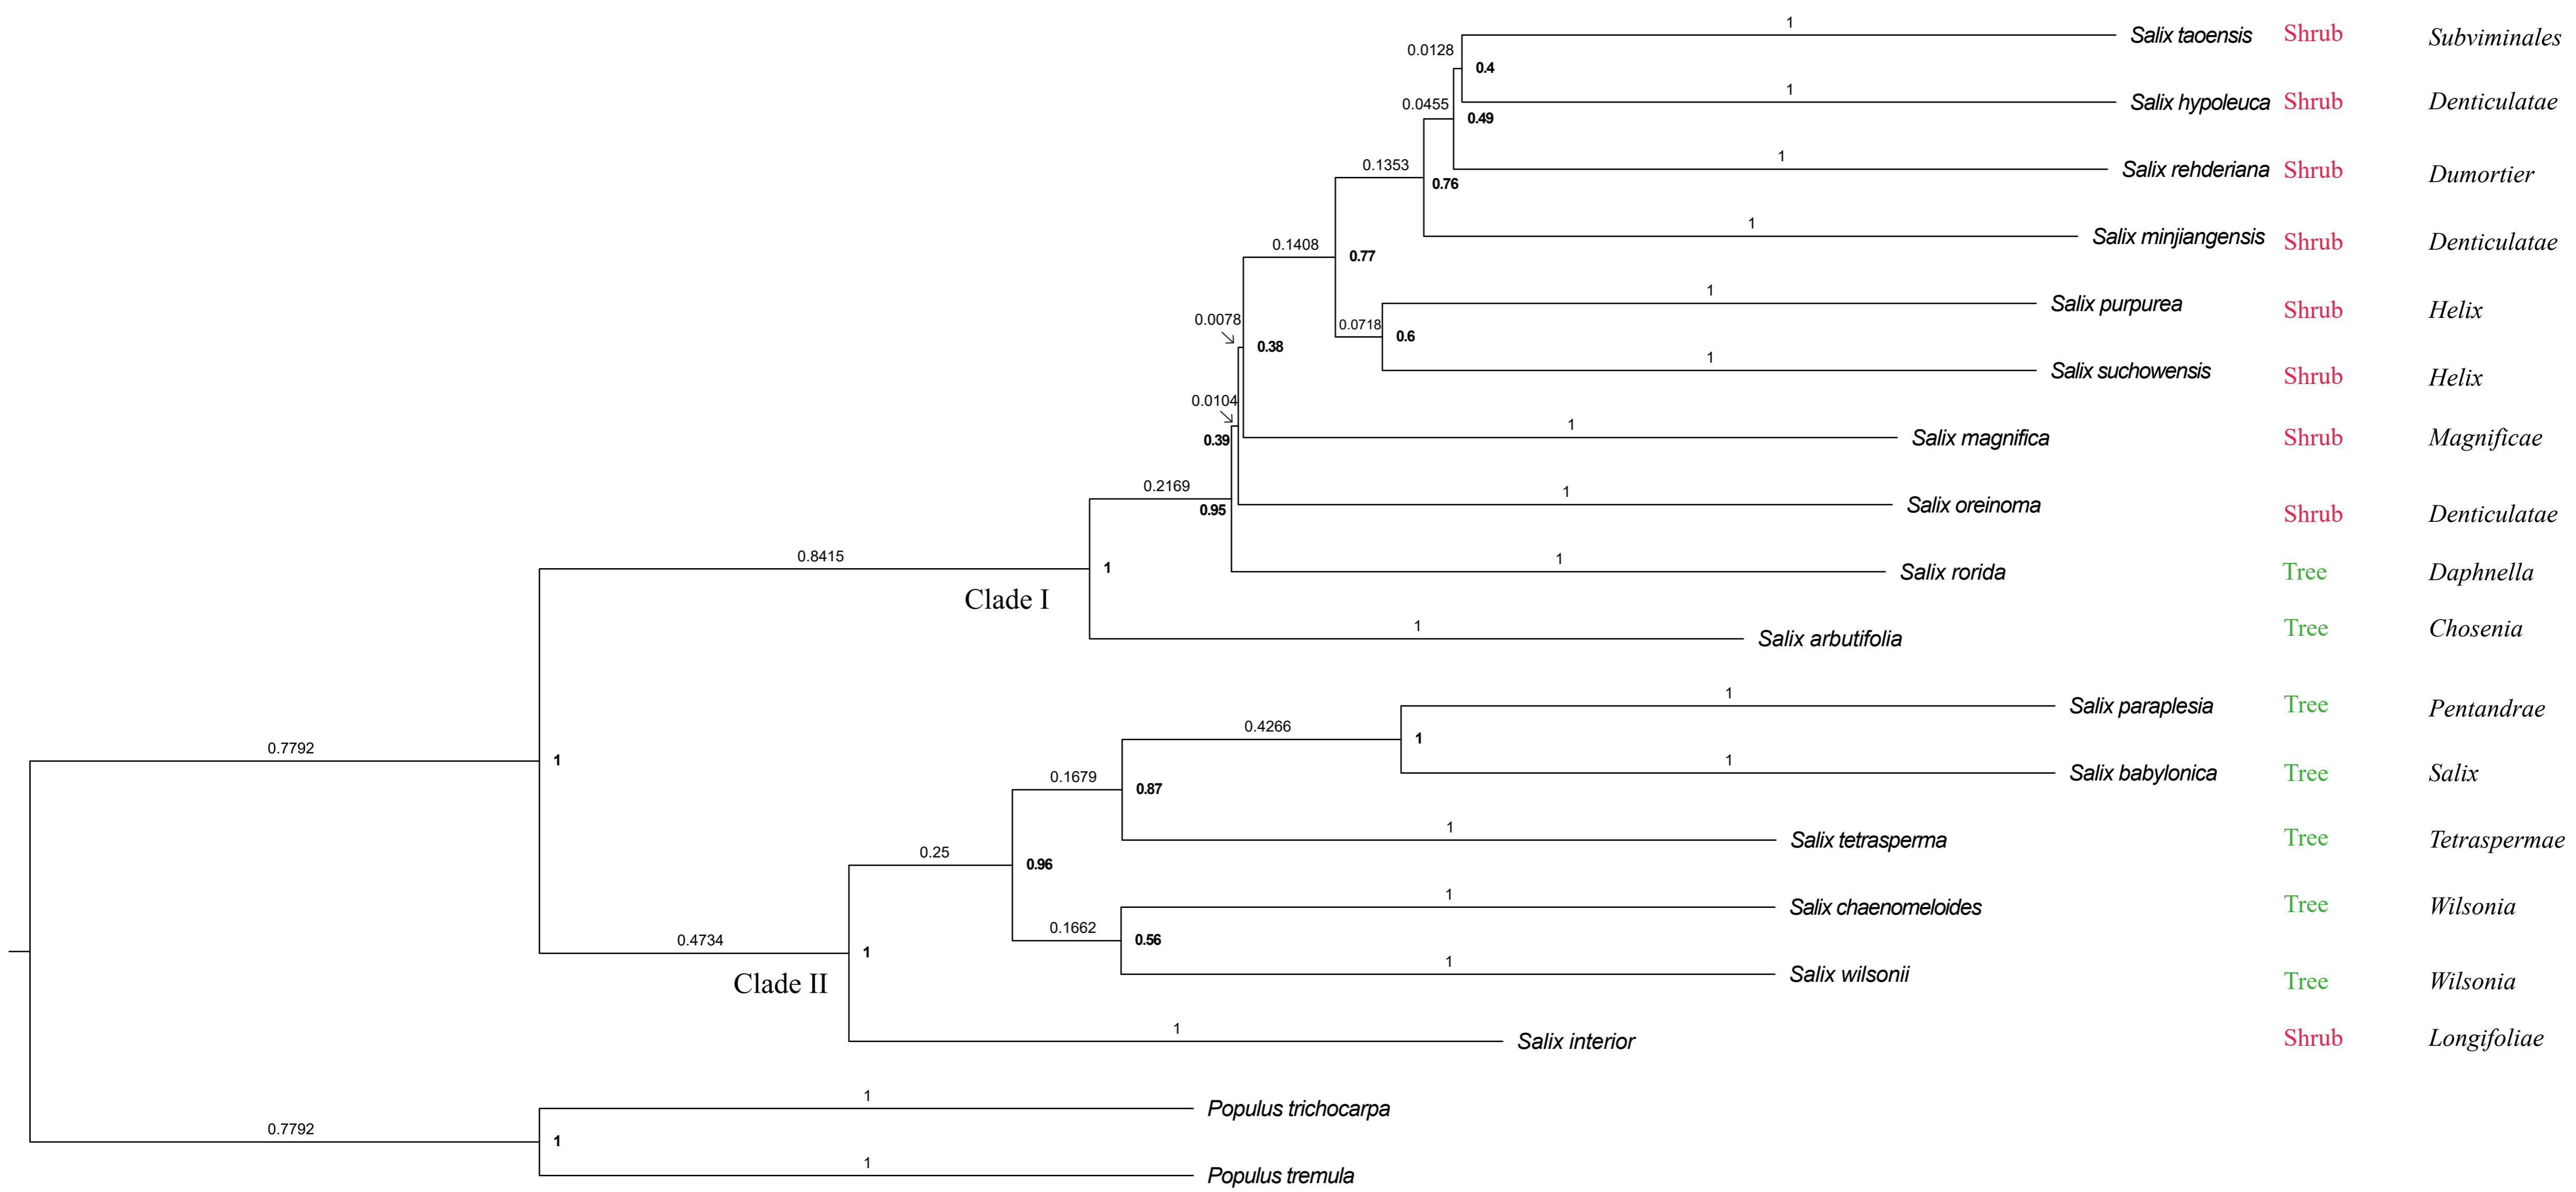

0.4
