# Supplementary material for: Analyzing and Characterizing the Chloroplast Genome of Salix wilsonii
Source: Biomed Res Int. 2019 Jul 15;2019:5190425. doi: 10.1155/2019/5190425 (PMC6662467; doi:10.1155/2019/5190425)
Supplement: Supplementary 3 — Table S3: statistics of repeat sequences in the Salix wilsonii cp genome. [file 5190425.f3.xlsx]

## Sheet: repeat_position_1
Table S3 Statistics of repeat sequences in Salix wilsonii cp genome
Type	No.	Size (bp)	Repeat unit	Location
Tandem repeats	1	18	AATTATTAAGGAATTAAC×2	IGS (trnH-GUG .. rps19)
	2	12	TGAATAACTAAA×2	IGS (ycf15.. trnL-CAA)
	3	13	TAGTATTAGATTA×2	IGS (rps12 .. trnV-GAC)
	4	23	TTTTTTATTTCTATTAAATTAAA×2	IGS (trnR-ACG.. trnN-GUU)
	5	16	CTTAATTGGCTAGTTG×2	IGS (trnR-ACG .. trnN-GUU)
	6	13	TTCTATTTCTATA×2	IGS (trnN-GUU .. ycf1)
	7	13	ATATAGAAATAGA×2	IGS (Ψycf1 .. trnN-GUU)
	8	16	CAACTAGCCAATTAAG×2	IGS (trnN-GUU .. trnR-ACG)
	9	23	AATTTAATTTAATAGAAATAAAA×2	IGS (trnN-GUU .. trnR-ACG)
	10	13	TAATCTAATACTA×2	IGS (trnV-GAC .. rps12)
	11	12	ATTTAGTTATTC×2	IGS (trnL-CAA .. ycf15)
	12	18	GTTAATTCCTTAATAATT×2	IGS (rps19 .. rpl22)
	13	21	TATCTATAAATATAAATTTAG×2	rpl16 intron
	14	16	ATATTTATATATAATA×2	IGS (trnP-UGG .. trnW-CCA)
	15	19	TATATAGGTGGAGGTACTC×2	IGS (trnV-UAC .. ndhC)
	16	11	AAAGCTATTCT×2	IGS (trnF-GAA .. trnL-UAA)
	17	25	AACGAAAAGAGAGAATAAGATAAAC×2	IGS (trnF-GAA .. trnL-UAA)
	18	21	TCATTAGATACCGATTCCTAT×2	IGS (trnL-UAA .. trnT-UGU)
	19	16	TATAAATAGAAATTTC×2	ycf3 intron
	20	13	ATTATTATTATTA×2	ycf3 intron
	21	19	ATAGGGTCAACTATACTGA×2	IGS (trnfM-CAU .. trnG-UCC)
	22	16	TATTCTTTCATTTTAG×2	IGS (psbD .. trnT-GGU)
	23	17	TATAACTATAATTACTA×2	IGS (psbD .. trnT-GGU)
	24	13	ATTGAATTCAATT×2	IGS (psbM .. petN)
	25	22	GTGGGATAATGCTAAATTATAA×2	IGS (atpI .. atpH)
	26	22	CTTTTCTTAATCTTTATTATAA×2	IGS (atpA .. trnR-UCU)
	27	13	AATTAAAAATGAA×2	IGS (trnR-UCU .. trnG-GCC)
	28	17	TAGAAAAATATATTAGA×2	IGS (trnQ-UUG .. trnK-UUU)
	29	21	GTGTTCATTTCTTGTTAGTTT×2	IGS (trnQ-UUG .. trnK-UUU)
	30	14	CCTAATTATTTTAT×2	IGS (trnQ-UUG .. trnK-UUU)
	31	19	AAATGGATAAGACTTTTGT×2	IGS (psbA .. trnH-GUG)
	32	18	AATTATTAAGGAATTAAC×2	IGS (trnH-GUG .. rps19)
Forward repeats	1	68	GCAATCCCGATTTGAGAATGAAGATAACTGTCAATGCAACTATTGATGTAATTATTCCAACTATATTT	IGS (psaI..accD); IGS (trnS-GGA..ycf3)
	2	55	CCATTTAGCTATTGCAATTCTTTTCCTGGTAGCGGGTCACATGTATAGGACTAAC	psaA; psaB
	3	49	ATTCTTTTCCTGGTAGCGGGTCACATGTATAGGACTAACTGGGGGATTG	psaA; psaB
	4	42	TCGAGGAGCCATATGAGGTGAAAATCTCATGTATGGTTCTGT	ndhA intron; IGS (trnV-GAC.. rps12)
	5	39	TTATTGATGATAGGGACGATATTGATGATAGTGACGATA	ycf2
	6	39	CGAGGAGCCGTATGAGGTGAAAATCTCATGTACGGTTCT	IGS (trnV-GAC..rps12); ycf3 intron
	7	39	GATATCGTCACTCACATCAATATCGTCACTATCATCAAT	ycf2
	8	39	ATGGCTGACCGATATTGCACACCACCATTTAGCTATTGC	psaA; psaB
	9	34	GATTGGTATTTTATTTAATTAGTATTTTATTTAA	IGS (trnV-UAC.. ndhC); IGS (trnM-CAU.. ndhC)
	10	30	TTTTATTTTTTTATTTCTATTAAATTAAAT	IGS (trnR-ACG.. trnN-GUU)
	11	30	TAATTTAATTTAATAGAAATAAAAAATTTA	IGS (trnN-GUU.. trnR-ACG)
	12	30	TAACGAAAAGAGAGAATAAGATAAACAACG	IGS (trnF-GAA.. trnL-UAA)
	13	32	CTTTTTGTCCAAGTTACTTCTTTTTTTGTCCA	ycf2
	14	32	GTTAGACAAAAAGAGAAGAAACTTGGACAAAA	ycf2
	15	32	TAATAAATAAAAGTAATAAATAAAGATAATAT	IGS (rpoC2.. rps2)
	16	31	TATAAATGAATTTATATAAATGCATTTATTT	IGS (trnR-ACG.. trnN-GUU); IGS (trnN-GUU..trnR-ACG)
	17	31	TTTCTATTTCTATATTCTATTTCTATATATA	IGS (trnN-GUU..ycf1); IGS (trnP-UGG..trnW-CCA)
	18	30	AATATAATATTATTAAAACAATAAATTCAT	IGS (psbB..clpP)
	19	30	TTTATTATATTTATATATTCTATTTCTATA	IGS (trnP-UGG..trnW-CCA); IGS (trnM-CAU..ndhC)
	20	30	GGCGGATAGCGGGAATCGAACCCGCATCTT	IGS (trnfM-CAU..trnG-UCC); trnG-GCC
	21	30	TCGAGGGTTCGAATCCCTCTCTCTCCTTTT	trnS-UGA; trnS-GCU
	22	30	TTAATAATTAGAATAATTAATAGAATAATT	IGS (trnG-GCC..trnS-GCU)
Reverse repeats	1	48	TAAAAATATATAAAATATAAAAAAATATAAATATAAAAAAATATAAAA	IGS( rpl14 .. rps8 )
	2	30	TTAATTAATTAATATTTAATAATAATTAAT	IGS( psbL .. psbJ )
Palindromic repeats	1	42	CTACAGAACCGTACATGAGATTTTCACCTCATACGGCTCCTC	IGS (rps12.. trnV-GAC); ndhA intron
	2	39	TTATTGATGATAGGGACGATATTGATGATAGTGACGATA	ycf2
	3	39	ATATTGATGATAGTGACGATATTGATGTGAGTGACGATA	ycf2
	4	39	ACAGAACCGTACATGAGATTTTCACCTCATACGGCTCCT	IGS (rps12.. trnV-GAC); ycf3 intron
	5	30	TGCGGAAAGAGAGGGATTCGAACCCTCGGT	IGS (rps4.. trnS-GGA); IGS (trnS-GCU.. psbI)
	6	30	TTTTATTTTTTTATTTCTATTAAATTAAAT	IGS (trnR-ACG.. trnN-GUU); IGS (trnN-GUU..trnR-ACG)
	7	30	ATTAAATTTTTTATTTCTATTAAATTAAAT	IGS (trnR-ACG.. trnN-GUU); IGS (trnN-GUU..trnR-ACG)
	8	32	CTTTTTGTCCAAGTTACTTCTTTTTTTGTCCA	ycf2
	9	32	TTTTTTGTCCAAGTTTCTTCTCTTTTTGTCTA	ycf2
	10	31	CATATATATAGAAATAGAATATAGAAATAGA	IGS (Ψycf1.. trnN-GUU); IGS (trnP-UGG.. trnW-CCA)
	11	30	TGGCTTTTTTTTTCTATTTTTTTTATTCTA	IGS (trnT-UGU.. rps4); IGS (trnC-GCA.. rpoB)
